# Supplementary material for: Akt1 deficiency does not affect fiber type composition or mitochondrial protein expression in skeletal muscle of male mice
Source: PubMed Central journal article supplement (PMC11387151; doi:10.14814/phy2.70048), 2024-09-10
Supplement: PHY2-12-e70048-s001.pdf [file PHY2-12-e70048-s001.pdf]

# Supplemental Figure 1

## Original western blotting images & Detailed experimental conditions

The rectangle area with white dotted line was cropped and used for the figure.

pan-Akt (predicted size; 60 kDa)

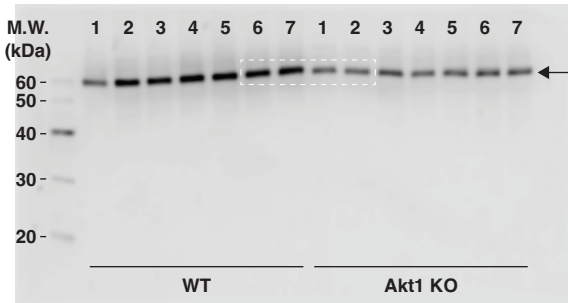

Protein Amount: 10 µg protein / lane

Gel system: TGX Any kD Precast Protein Gels, #4569036; BIO-RAD

Electrophoresis: 200V constant, 30-40 min

Transfer: Transblot Turbo; BIO-RAD, 2.5A contant, 3 min

Membrane: Trans-Blot® Turbo™ RTA Transfer PVDF Kit

Blocking: Bullet Blocking One (13779-01; Nacalai Tesqu), 5 min at r.t.

Primary Antibody: Akt (pan) (C67E7) Rabbit mAb #4691; Cell Signaling Technology  
1:1000 dilution, 4°C, Over Night

2nd Antibody: Peroxidase AffiniPure Goat Anti-Rabbit IgG (Cat#: 111-035-003)  
Jackson ImmunoResearch, 1:15000 dilution, 60 min at r.t.

Detection: ImmunoStar Zeta, 291-72401, FUJIFILM Wako

Scan & Quantification: C-DiGit Blot Scanner; LI-COR Biosciences

Akt1 (predicted size; 60 kDa)

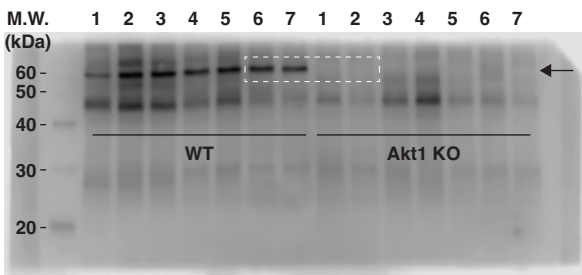

Protein Amount: 10 µg protein / lane

Gel system: TGX Any kD Precast Protein Gels, #4569036; BIO-RAD

Electrophoresis: 200V constant, 30-40 min

Transfer: Transblot Turbo; BIO-RAD, 2.5A contant, 3 min

Membrane: Trans-Blot® Turbo™ RTA Transfer PVDF Kit

Blocking: Bullet Blocking One (13779-01; Nacalai Tesqu), 5 min at r.t.

Primary Antibody: Akt1 (2H10) Mouse mAb; Cell Signaling Technology  
1:1000 dilution, 4°C, Over Night

2nd Antibody: Peroxidase AffiniPure Goat Anti-Mouse IgG (Cat#: 115-035-003)  
Jackson ImmunoResearch, 1:15000 dilution, 60 min at r.t.

Detection: ImmunoStar Zeta, 291-72401, FUJIFILM Wako

Scan & Quantification: C-DiGit Blot Scanner; LI-COR Biosciences

Akt2 (predicted size; 60 kDa)

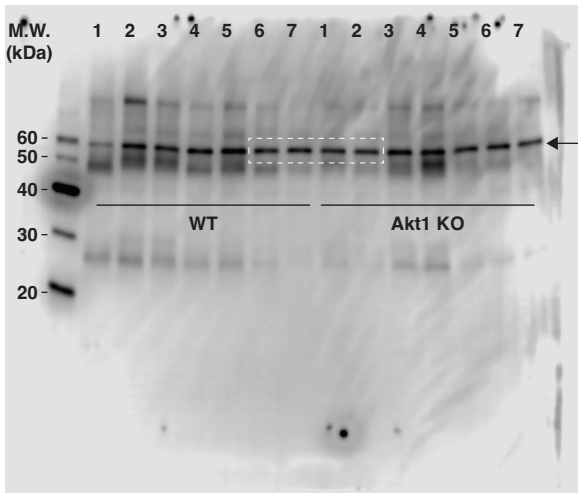

Protein Amount: 10 µg protein / lane

Gel system: TGX Any kD Precast Protein Gels, #4569036; BIO-RAD

Electrophoresis: 200V constant, 30-40 min

Transfer: Transblot Turbo; BIO-RAD, 2.5A contant, 3 min

Membrane: Trans-Blot® Turbo™ RTA Transfer PVDF Kit

Blocking: Bullet Blocking One (13779-01; Nacalai Tesqu), 5 min at r.t.

Primary Antibody: Akt2 (5B5) Rabbit mAb; Cell Signaling Technology  
1:1000 dilution, 4°C, Over Night

2nd Antibody: Peroxidase AffiniPure Goat Anti-Rabbit IgG (Cat#: 111-035-003)  
Jackson ImmunoResearch, 1:15000 dilution, 60 min at r.t.

Detection: ImmunoStar Zeta, 291-72401, FUJIFILM Wako

Scan & Quantification: C-DiGit Blot Scanner; LI-COR Biosciences

### Oxphos Complex

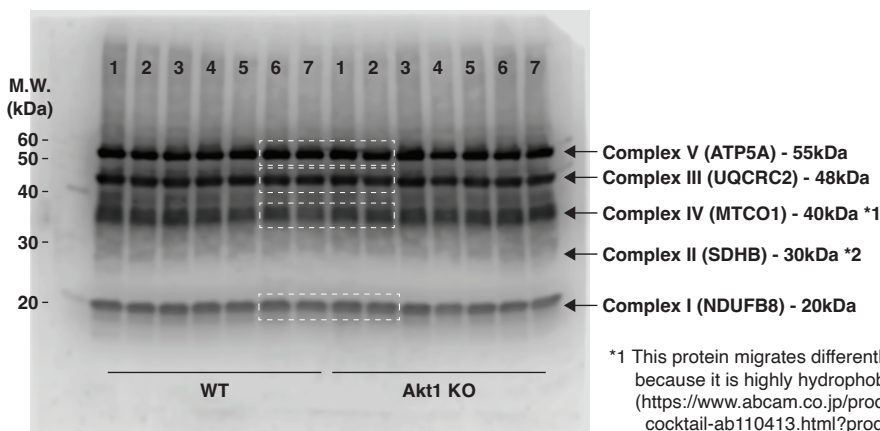

Protein Amount: 10 µg protein / lane

Gel system: TGX Any kD Precast Protein Gels, #4569036; BIO-RAD

Electrophoresis: 200V constant, 30-40 min

Transfer: Transblot Turbo; BIO-RAD, 2.5A constant, 3 min

Membrane: Trans-Blot® Turbo™ RTA Transfer PVDF Kit

Blocking: Bullet Blocking One (13779-01; Nacalai Tesqu), 5 min at r.t.

Primary Antibody: Total OXPHOS Rodent WB Antibody Cocktail ab110413; Abcam  
1:1000 dilution, 4°C, Over Night

2nd Antibody: Peroxidase AffiniPure Goat Anti-Mouse IgG (Cat#: 115-035-003)  
Jackson ImmunoResearch, 1:15000 dilution, 60 min at r.t.

Detection: ImmunoStar Zeta, 291-72401, FUJIFILM Wako

Scan & Quantification: C-DiGit Blot Scanner; LI-COR Biosciences

### Complex II

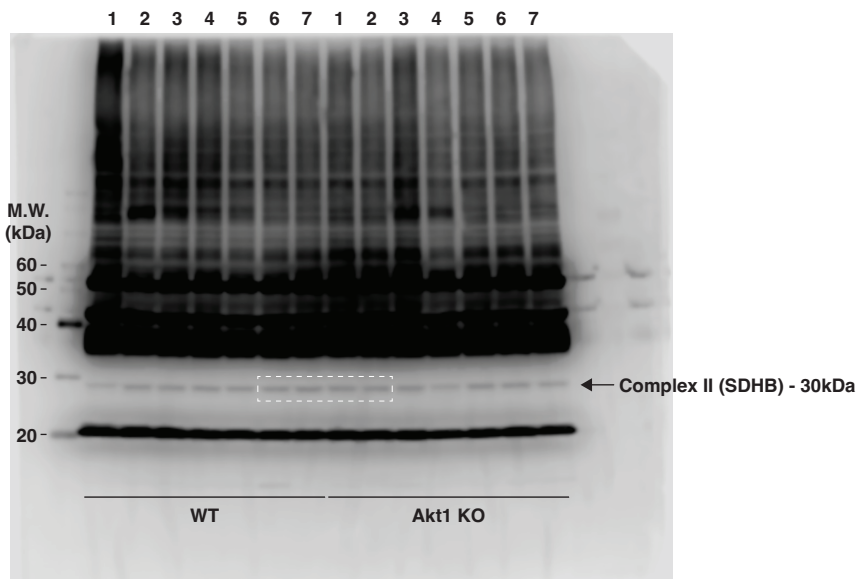

Protein Amount: 10 µg protein / lane

Gel system: e-PAGEL E-R520L (5~20%); ATTO

Electrophoresis: 20mA/Gel constant, 75-80 min

Transfer: Criterion Blotter; BIO-RAD, 0.3A constant, 60 min

Membrane: Immun-Blot PVDF; BIO-RAD

Blocking: Bullet Blocking One (13779-01; Nacalai Tesqu), 5 min at r.t.

Primary Antibody: Total OXPHOS Rodent WB Antibody Cocktail ab110413; Abcam  
1:1000 dilution, 4°C, Over Night

2nd Antibody: Peroxidase AffiniPure Goat Anti-Mouse IgG (Cat#: 115-035-003)  
Jackson ImmunoResearch, 1:15000 dilution, 60 min at r.t.

Detection: ImmunoStar LD, 296-69901, FUJIFILM Wako

Scan & Quantification: C-DiGit Blot Scanner; LI-COR Biosciences

**PGC-1 $\alpha$**  (predicted size; 130 kDa)

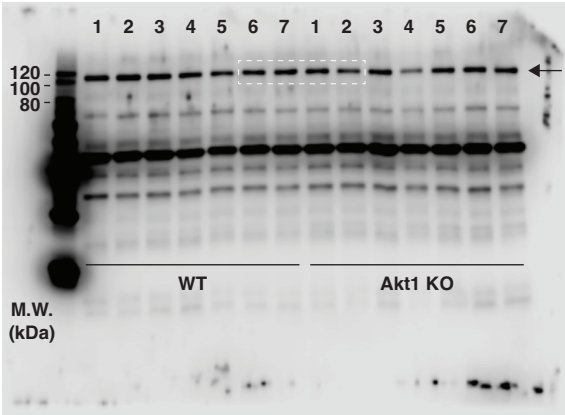

Protein Amount: 10  $\mu$ g protein / lane  
 Gel system: TGX Any kD Precast Protein Gels, #4569036; BIO-RAD  
 Electrophoresis: 200V constant, 30-40 min  
 Transfer: Transblot Turbo; BIO-RAD, 2.5A contant, 3 min  
 Membrane: Trans-Blot® Turbo™ RTA Transfer PVDF Kit  
 Blocking: Bullet Blocking One (13779-01; Nacalai Tesqu), 5 min at r.t.  
 Primary Antibody: Anti-PGC-1 Antibody AB3242; Merck Millipore  
 1:1000 dilution, 4°C, Over Night  
 2nd Antibody: Peroxidase AffiniPure Goat Anti-Rabbit IgG (Cat#: 111-035-003)  
 Jackson ImmunoResearch, 1:15000 dilution, 60 min at r.t.  
 Detection: ImmunoStar Zeta, 291-72401, FUJIFILM Wako  
 Scan & Quantification: C-DiGit Blot Scanner; LI-COR Biosciences

**Phospho-ACLY-S455** (predicted size; 121 kDa)

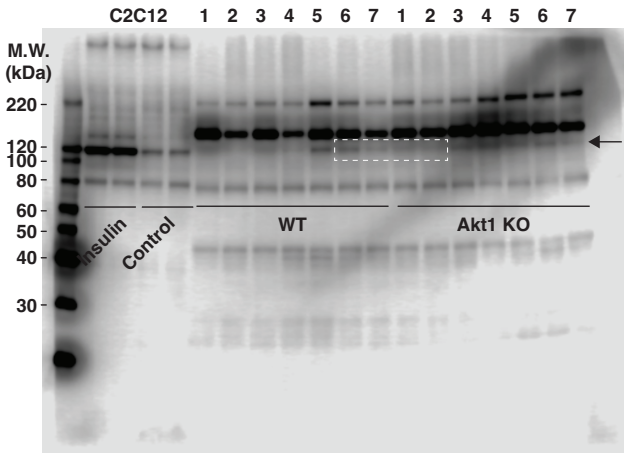

Protein Amount: 10  $\mu$ g protein / lane  
 Gel system: e-PAGEL E-R520L (5~20%); ATTO  
 Electrophoresis: 20mA/Gel constant, 75-80 min  
 Transfer: Criterion Blotter; BIO-RAD, 0.3A contant, 120-150 min  
 Membrane: Immun-Blot PVDF; BIO-RAD  
 Blocking: Bullet Blocking One (13779-01; Nacalai Tesqu), 5 min at r.t.  
 Primary Antibody: Phospho-ACLY-S455 Rabbit pAb AP0779; ABclonal  
 1:1000 dilution, 4°C, Over Night  
 2nd Antibody: Peroxidase AffiniPure Goat Anti-Rabbit IgG (Cat#: 111-035-003)  
 Jackson ImmunoResearch, 1:15000 dilution, 60 min at r.t.  
 Detection: ImmunoStar LD, 296-69901, FUJIFILM Wako  
 Scan & Quantification: C-DiGit Blot Scanner; LI-COR Biosciences

A protein lysate prepared from untreated and insulin-treated murine myoblasts (C2C12) was included as a positive control for the phosphorylation of ACLY protein. C2C12 myoblasts were treated with insulin (10nM) dissolved in serum/antibiotics-free media for 15 min.

**Total-ACLY** (predicted size; 121 kDa)

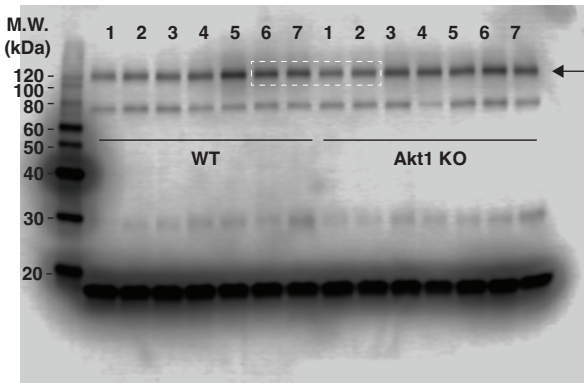

Protein Amount: 10  $\mu$ g protein / lane  
 Gel system: TGX Any kD Precast Protein Gels, #4569036; BIO-RAD  
 Electrophoresis: 200V constant, 30-40 min  
 Transfer: Transblot Turbo; BIO-RAD, 2.5A contant, 3 min  
 Membrane: Trans-Blot® Turbo™ RTA Transfer PVDF Kit  
 Blocking: Bullet Blocking One (13779-01; Nacalai Tesqu), 5 min at r.t.  
 Primary Antibody: ATP-Citrate Lyase (D1X6P) Rabbit mAb #13390; CST  
 1:1000 dilution, 4°C, Over Night  
 2nd Antibody: Peroxidase AffiniPure Goat Anti-Rabbit IgG (Cat#: 111-035-003)  
 Jackson ImmunoResearch, 1:15000 dilution, 60 min at r.t.  
 Detection: ImmunoStar LD, 296-69901, FUJIFILM Wako  
 Scan & Quantification: C-DiGit Blot Scanner; LI-COR Biosciences

**GLUT4 (predicted size; 55 kDa)**

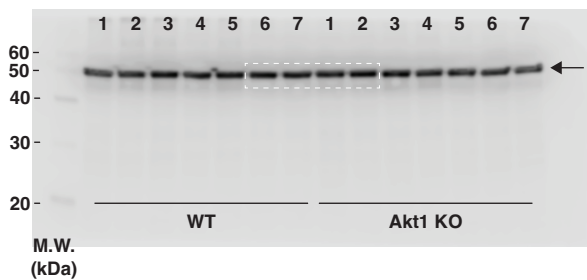

Protein Amount: 10 µg protein / lane  
 Gel system: TGX Any kD Precast Protein Gels, #4569036; BIO-RAD  
 Electrophoresis: 200V constant, 30-40 min  
 Transfer: Transblot Turbo; BIO-RAD, 2.5A contant, 3 min  
 Membrane: Trans-Blot® Turbo™ RTA Transfer PVDF Kit  
 Blocking: Bullet Blocking One (13779-01; Nacalai Tesqu), 5 min at r.t.  
 Primary Antibody: GLUT4 Monoclonal antibody 66846-1-Ig; Proteintech  
 1:2000 dilution, 4°C, Over Night  
 2nd Antibody: Peroxidase AffiniPure Goat Anti-Anti-Mouse IgG (Cat#: 115-035-003)  
 Jackson ImmunoResearch, 1:15000 dilution, 60 min at r.t.  
 Detection: ImmunoStar Zeta, 291-72401, FUJIFILM Wako  
 Scan & Quantification: C-DiGit Blot Scanner; LI-COR Biosciences

**Phos-FoxO1-Thr24 (predicted size; 78-82 kDa)**

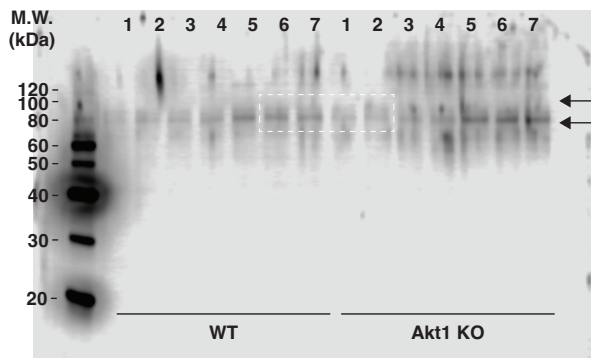

← **phos-FoxO3a (Thr32), 95 kDa, undetermined**  
 ← **phos-FoxO1 (Thr24), 78-82 kDa**

Protein Amount: 10 µg protein / lane  
 Gel system: TGX Any kD Precast Protein Gels, #4569036; BIO-RAD  
 Electrophoresis: 200V constant, 30-40 min  
 Transfer: Transblot Turbo; BIO-RAD, 2.5A contant, 3 min  
 Membrane: Trans-Blot® Turbo™ RTA Transfer PVDF Kit  
 Blocking: Bullet Blocking One (13779-01; Nacalai Tesqu), 5 min at r.t.  
 Primary Antibody: Phospho-FoxO1 (Thr24)/FoxO3a (Thr32) Antibody  
 #9464; CST  
 1:1000 dilution, 4°C, Over Night  
 \*Phospho-FoxO1 (Thr24)/FoxO3a (Thr32) Antibody detects endogenous levels  
 of FoxO1/FoxO3a only when phosphorylated at threonine 24 of FoxO1 or  
 threonine 32 of FoxO3a.  
 2nd Antibody: Peroxidase AffiniPure Goat Anti-Rabbit IgG (Cat#: 111-035-003)  
 Jackson ImmunoResearch, 1:15000 dilution, 60 min at r.t.  
 Detection: ImmunoStar Zeta, 291-72401, FUJIFILM Wako  
 Scan & Quantification: C-DiGit Blot Scanner; LI-COR Biosciences

**Total-FoxO1 (predicted size; 78-82 kDa)**

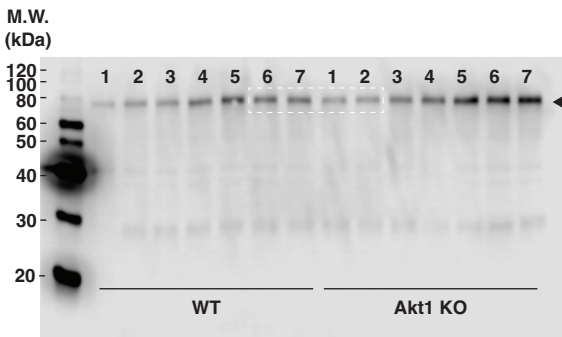

Protein Amount: 10 µg protein / lane  
 Gel system: TGX Any kD Precast Protein Gels, #4569036; BIO-RAD  
 Electrophoresis: 200V constant, 30-40 min  
 Transfer: Transblot Turbo; BIO-RAD, 2.5A contant, 3 min  
 Membrane: Trans-Blot® Turbo™ RTA Transfer PVDF Kit  
 Blocking: Bullet Blocking One (13779-01; Nacalai Tesqu), 5 min at r.t.  
 Primary Antibody: FoxO1 (C29H4) Rabbit mAb #2880; CST  
 1:1000 dilution, 4°C, Over Night  
 2nd Antibody: Peroxidase AffiniPure Goat Anti-Rabbit IgG (Cat#: 111-035-003)  
 Jackson ImmunoResearch, 1:15000 dilution, 60 min at r.t.  
 Detection: ImmunoStar Zeta, 291-72401, FUJIFILM Wako  
 Scan & Quantification: C-DiGit Blot Scanner; LI-COR Biosciences
